# Supplementary material for: ALIX and ESCRT-I/II function as parallel ESCRT-III recruiters in cytokinetic abscission
Source: PubMed Central journal article supplement — J Cell Biol. 2016 Feb 29;212(5):499–513. doi: 10.1083/jcb.201507009 (PMC4772496; doi:10.1083/jcb.201507009), 2016-02-29
Supplement: JCB_201507009_sm.pdf [file JCB_201507009_sm.pdf]

Christ et al., <http://www.jcb.org/cgi/content/full/jcb.201507009/DC1>

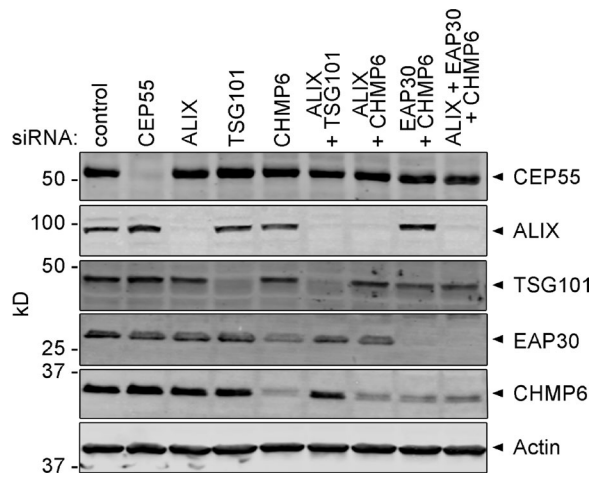

Figure S1. **Knockdown efficiency of siRNAs used.** HeLa cells were transfected with siRNA as indicated.

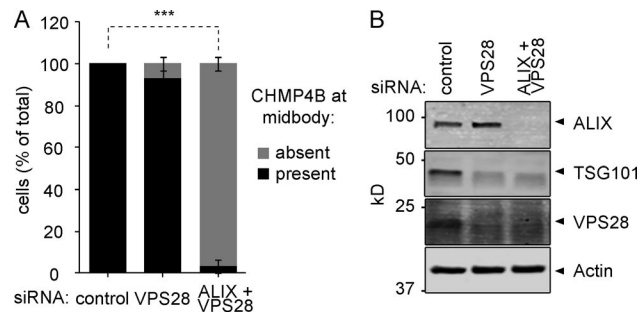

Figure S2. **Depletion of VPS28 decreases TSG101 levels and phenocopies TSG101 depletion.** (A) Confocal images of HeLa cells upon siRNA treatment as indicated, quantifying CHMP4B recruitment to the midbody (error bars indicate SEM;  $n > 30$  cells from three independent experiments; unpaired  $t$  test; \*\*\*,  $P < 0.001$ ). (B) Knockdown of ALIX and VPS28 and codepletion of TSG101 is shown.

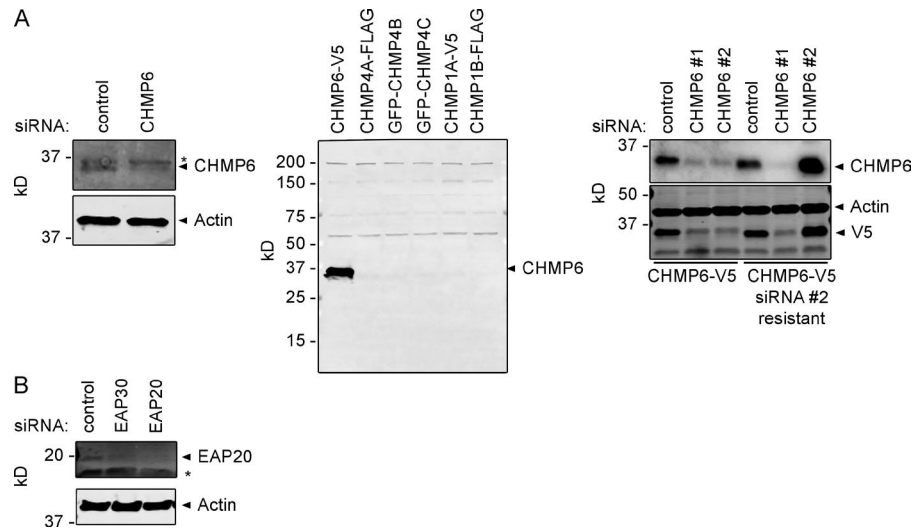

Figure S3. **Characterization of CHMP6 and EAP20 antibodies.** (A) The anti-CHMP6 antibody used recognizes endogenous (left blot), transiently overexpressed (middle blot), and stably expressed (right blot) CHMP6 on Western blot but does not react with any other transiently transfected ESCRT-III subunits (middle blot; \*, nonspecific immunoreactivity). Cells were transfected with siRNA or plasmids as indicated. (B) The anti-EAP20 antibody used recognizes endogenous EAP20 on Western blot (\*, nonspecific immunoreactivity). Cells were transfected with siRNA as indicated.

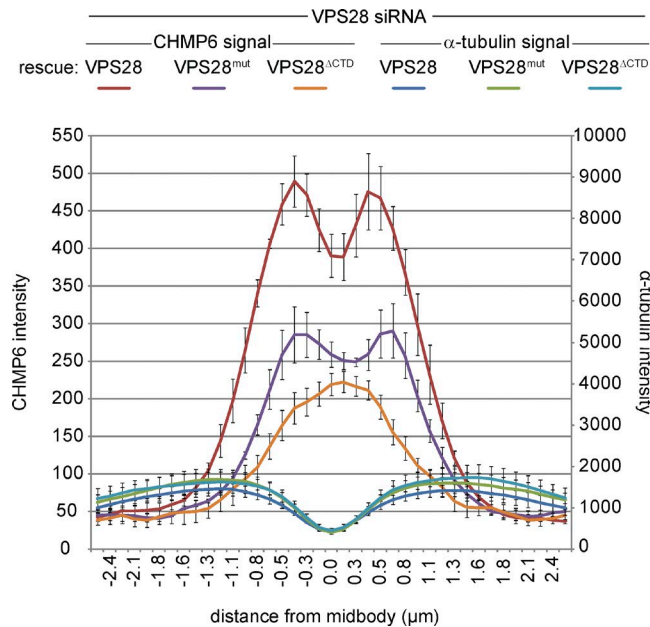

Figure S4. **VPS28 recruits CHMP6.** Intensity of CHMP6 and  $\alpha$ -tubulin along the intercellular bridge of cells depleted of endogenous VPS28 and stably expressing different siRNA-resistant VPS28 alleles (error bars indicate SEM from three independent experiments;  $n = 30$  cells; mean CHMP6 intensity in the bridge of VPS28<sup>mut</sup> cells relative to VPS28 [set to 1,  $\pm$  SEM],  $0.61 \pm 0.04$  [ $P = 0.01$ ], VPS28<sup>ΔCTD</sup> relative to VPS28,  $0.43 \pm 0.05$  [ $P = 0.01$ ], VPS28<sup>ΔCTD</sup> relative to VPS28<sup>mut</sup>,  $0.7 \pm 0.07$  [ $P = 0.05$ ]; P-values obtained using a one-sample  $t$  test).

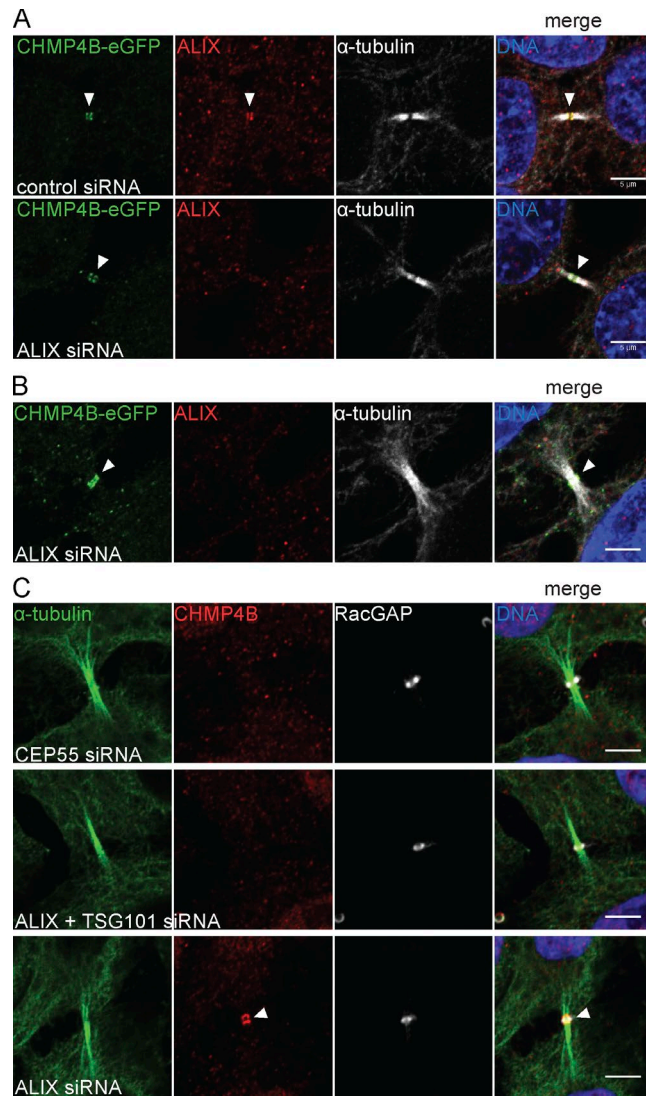

Figure S5. **CHMP4B localizes to the midbody in the absence of ALIX including to intercellular bridges with continuous  $\alpha$ -tubulin staining.** (A) Confocal images of HeLa cells stably expressing CHMP4B-eGFP showing localization of CHMP4B and ALIX to the midbody upon siRNA treatment as indicated, stained for DNA (Hoechst), GFP,  $\alpha$ -tubulin, and ALIX. Bars, 5  $\mu$ m. (B) Confocal image of HeLa cells stably expressing CHMP4B-eGFP showing localization of CHMP4B to continuous cytokinetic bridge in the absence of ALIX, stained for DNA (Hoechst), GFP,  $\alpha$ -tubulin, and ALIX. Bar, 5  $\mu$ m. (C) Confocal images of HeLa cells showing localization of CHMP4B to continuous cytokinetic bridges. Bars, 5  $\mu$ m. Cells were transfected with siRNA as indicated and stained for DNA (Hoechst), CHMP4B,  $\alpha$ -tubulin, and RacGAP1. Arrowheads point at proteins recruited to the cytokinetic midbody.

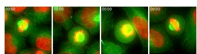

Video 1. **Codepletion of TSG101 and ALIX increases the abscission delay.** Live imaging of HeLa cells stably expressing Histone2B-mCherry and eGFP- $\alpha$ -tubulin, transfected with control siRNA (first panel), siRNA against TSG101 (second panel), siRNA against ALIX (third panel), or siRNA against both ALIX and TSG101 (fourth panel; time lapse, 5 min).

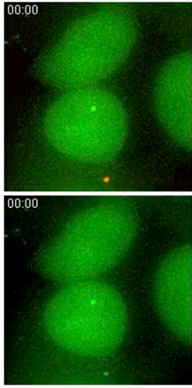

Video 2. **CHMP4B localizes to the midbody of ALIX-depleted cells undergoing of furrow regression.** Live imaging of a HeLa cell stably expressing mCherry-CEP55 and CHMP4B-eGFP undergoing furrow regression upon ALIX siRNA treatment (top, merged; bottom, CHMP4B-eGFP only; time lapse, 6 min).

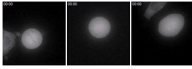

Video 3. **CHMP4C recruitment depends on ALIX.** Live imaging of HeLa cells stably expressing eGFP-CHMP4C transfected with control siRNA (first panel), siRNA against ALIX (second panel), and siRNA against TSG101 (third panel; time lapse, 7 min).

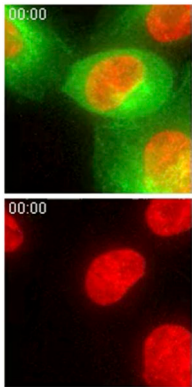

Video 4. **Depletion of ALIX leads to furrow regression in cells with chromosome segregation defects.** Live imaging of a HeLa cell stably expressing Histone2B-mCherry and eGFP- $\alpha$ -tubulin undergoing furrow regression upon ALIX siRNA treatment (top, merged; bottom, Histone2B-mCherry only; time lapse, 5 min).

Table S1. **Plasmids and cell lines used in this study**

| Plasmid name                                          | Relevant characteristics                                                                                  |
|-------------------------------------------------------|-----------------------------------------------------------------------------------------------------------|
| pcDNA3.1(+)-CMV-Gateway                               | pcDNA3.1 vector modified to contain the attR1-CamR-ccdB-attR2 cassette                                    |
| pcDNA3.1(+)-CMV_CHMP6-V5                              | Transient high expression of full-length CHMP6-V5                                                         |
| pcDNA3.1(+)-CMV_CHMP6(core)-V5                        | Transient high expression of truncated CHMP6(1-152)-V5                                                    |
| pcDNA3.1(+)-PGK-Gateway                               | CMV promoter replaced by PGK promoter                                                                     |
| pCDH-PGK-IRES-PURO                                    | Lentiviral vector allowing coexpression of PURO selection marker with transgene of interest               |
| pCDH-PGK-IRES-BSD                                     | Lentiviral vector allowing coexpression of BSD selection marker with transgene of interest                |
| pCW57.1-PURO_HAeGFP-CHMP4C                            | Doxycycline-induced expression of full-length HAeGFP-CHMP4C                                               |
| pCDH-PGK-IRES-BSD_VPS28 resistant                     | Stable low expression of full-length siRNA-resistant VPS28                                                |
| pCDH-PGK-IRES-BSD_VPS28(mut) resistant                | Stable low expression of siRNA-resistant VPS28(F206A, D207S, E209A)                                       |
| pCDH-PGK-IRES-BSD_VPS28( $\Delta$ CTD) resistant      | Stable low expression of truncated siRNA-resistant VPS28(1-123)                                           |
| pCDH-PGK-IRES-BSD_CHMP4C resistant                    | Stable low expression of full-length untagged siRNA-resistant CHMP4C                                      |
| pCDH-PGK-IRES-BSD_CHMP4C( $\Delta$ ALIX) resistant    | Stable low expression of truncated untagged siRNA-resistant CHMP4C(1-215), lacking its ALIX-binding motif |
| pCDH-PGK-IRES-BSD_CHMP4B-V5 resistant                 | Stable low expression of full-length siRNA-resistant CHMP4B-V5                                            |
| pCDH-PGK-IRES-BSD_CHMP4B( $\Delta$ ALIX)-V5 resistant | Stable low expression of truncated siRNA-resistant CHMP4B(1-205)-V5, lacking its ALIX-binding motif       |
| pCDH-PGK-IRES-BSD_CHMP4C-V5 resistant                 | Stable low expression of full-length siRNA-resistant CHMP4C-V5                                            |
| pCDH-PGK-IRES-BSD_CHMP4C( $\Delta$ Alix)-V5 resistant | Stable low expression of truncated siRNA-resistant CHMP4C(1-215)-V5, lacking its ALIX-binding motif       |
| pCDH-PGK-IRES-BSD_EAP30                               | Stable low expression of untagged siRNA-sensitive EAP30                                                   |
| pCDH-PGK-IRES-BSD_EAP30 resistant                     | Stable low expression of untagged siRNA-resistant EAP30                                                   |
| pCDH-PGK-IRES-PURO_mCherry-TSG101                     | Stable low expression of mCherry-TSG101                                                                   |
| pCDH-PGK-IRES-BSD_CHMP6-V5                            | Stable low expression of siRNA-sensitive CHMP6-V5                                                         |
| pCDH-PGK-IRES-BSD_CHMP6-V5 resistant                  | Stable low expression of siRNA-resistant CHMP6-V5                                                         |
